# Supplementary material for: pH-Responsive antibacterial metal–phenolic network coating on hernia meshes
Source: Royal Society of Chemistry journal article supplement (doi:10.1039/d4bm00289j), 2024-01-01
Supplement: d4bm00289j1.pdf [file d4bm00289j1.pdf]

## Supplementary materials

# pH-responsive antibacterial metal-phenolic network coating on hernia mesh

Rui Ding <sup>a</sup>, Pandi Peng <sup>a</sup>, Jingjing Huo <sup>a</sup>, Kun Wang <sup>a</sup>, Pengxiang Liu <sup>a</sup>, Hanxue Wu <sup>a</sup>,

Likun Yan <sup>b, \*</sup>, Peng Li <sup>a, \*</sup>

<sup>a</sup>Frontiers Science Center for Flexible Electronics (FSCFE), Xi'an Institute of Flexible Electronics (IFE), Xi'an Institute of Biomedical Materials and Engineering (IBME), Northwestern Polytechnical University (NPU), Xi'an, 710072, China

<sup>b</sup> Department of General Surgery, Shaanxi Provincial People's Hospital, Xi'an, 710068, China

### **\*Corresponding Author**

Likun Yan – Department of General Surgery, Shaanxi Provincial People's Hospital, Xi'an, 710068, China; Email: [likunyansurgery@163.com](mailto:likunyansurgery@163.com)

Peng Li – Frontiers Science Center for Flexible Electronics (FSCFE), Xi'an Institute of Flexible Electronics (IFE) and Xi'an Institute of Biomedical Materials & Engineering (IBME), Northwestern Polytechnical University, Xi'an 710072, China; orcid.org/0000-0002-5876-2177; Email: [iamppli@nwpu.edu.cn](mailto:iamppli@nwpu.edu.cn)

**Table S1** The surface elemental composition of all samples

| Samples   | Elements (atom %) |            |           |
|-----------|-------------------|------------|-----------|
|           | C                 | O          | Cu        |
| PP        | 99.70±1.61        | 0.30±2.40  | /         |
| PP-CT(1)  | 89.18±1.56        | 10.54±1.64 | 0.28±0.56 |
| PP-CT(5)  | 87.91±1.61        | 9.89±1.71  | 2.20±0.58 |
| PP-CT(10) | 78.68±1.34        | 18.83±2.27 | 2.49±0.50 |

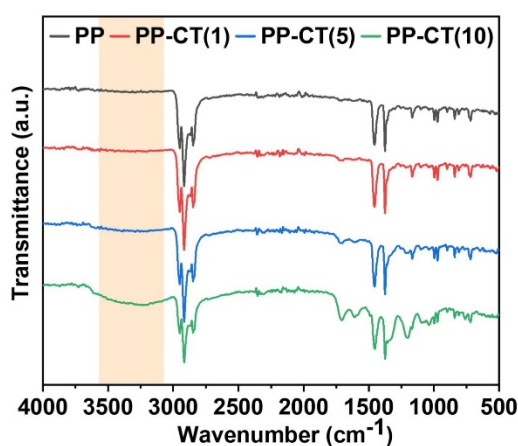

**Figure S1.** FTIR spectra of PP, PP-CT(1), PP-CT(5) and PP-CT(10).

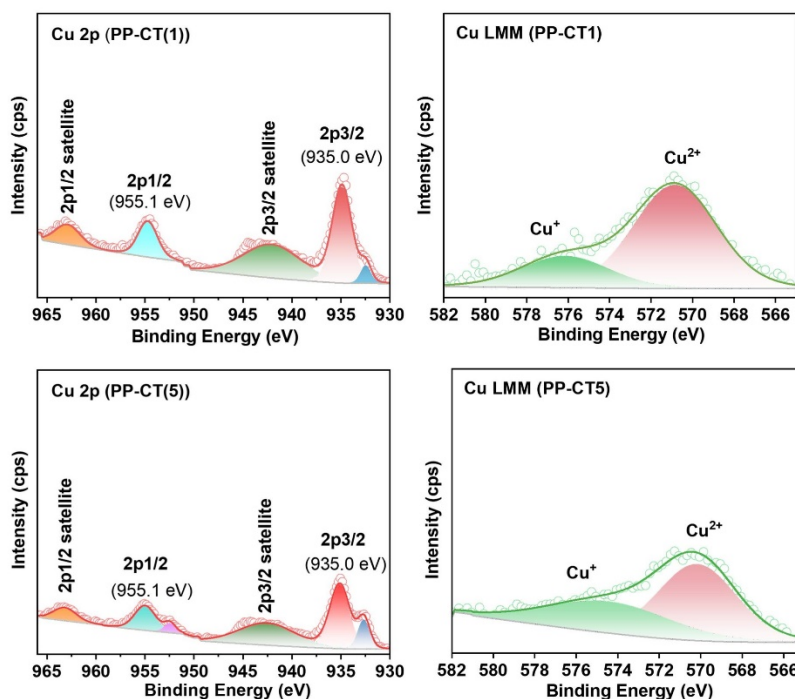

**Figure S2.** XPS high-resolution spectra of Cu 2p and Cu LMM of PP-CT(1) and PP-CT(5).

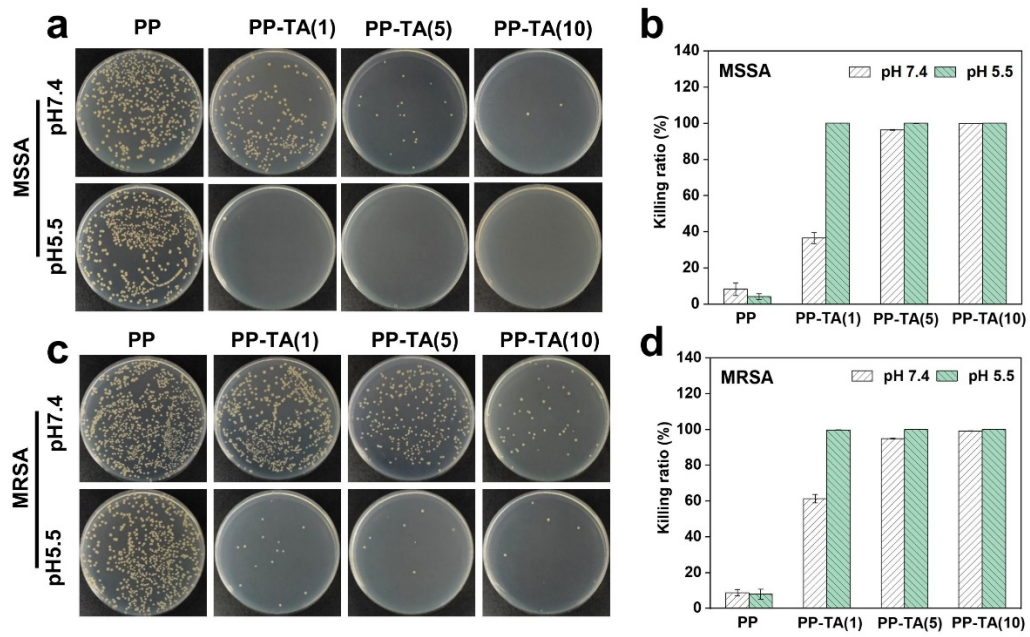

**Figure S3.** Colony formation of (a) MSSA and (c) MRSA, and the killing ratios against (b) MSSA and (d) MRSA after incubation 4 hours on the surfaces of pristine and TA coated PP meshes.

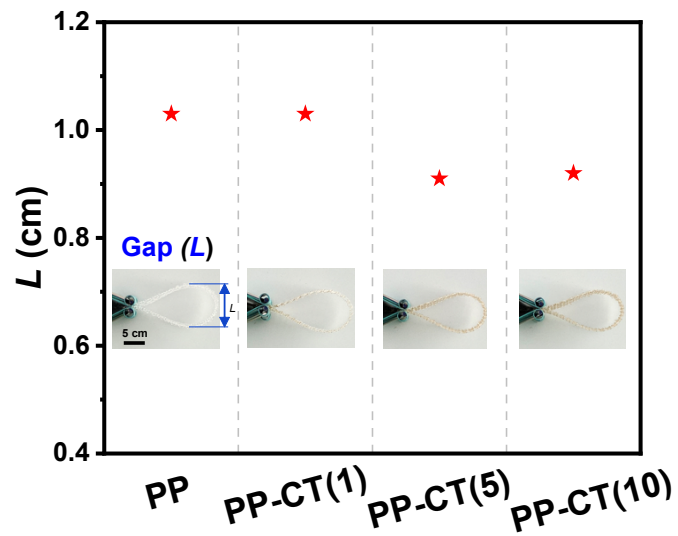

**Figure S4.** The gap length of folded pristine PP and CT coated PP meshes.

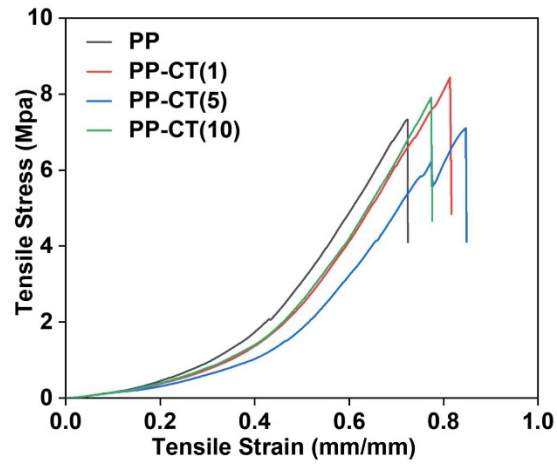

**Figure S5.** Tensile stress–strain curves of pristine and CT coated PP meshes
